# Supplementary material
Source: Springer Nature journal article supplement (https://www.springermedizin.de/resource/supplementary/12913_2011_1953_MOESM1_ESM.pdf/9530128)
Supplement: MOESM1 [file 9530128]

**1. Name of Children's Kidney Centre:**

**2. Where are renal transplants performed?**

MDT team members - Unit Profile

**3. Number of Consultants in Paediatric Nephrology ?**

- Details/ comments (NB: FOR ALL QUESTIONS)
- *Involved in teaching/ reinforcing?* (NB: FOR ALL QUESTIONS)

**4. Number of Junior Doctors (i.e.: attached to Nephrology)?**

**5. Who performs renal surgery? (Transplants, PD catheter, central line insertion etc),**

**6. Number of Urology doctors part of the team**

**7. Number of Urology nurses part of the team**

**8. Number of Renal Specialist nurses**

**9. How is the nursing set up (between the ward and the dialysis unit)**

i.e: Split or rotational

**10. Number of trained Haemo dialysis nurses**

**11. Number of trained peritoneal dialysis nurses**

**12. Number of Nurses who work on Renal Ward**

**13. Number of Renal Ward Health Care Assistants?**

**14. Are there any renal paediatric nurses involved in OPD clinics?**

**15. Number of Dieticians**

- Are they Renal Dietician(s)

**16. Do you have a counsellor?**

- Are they a Renal Counsellor

**17. Do you have access to a Clinical Psychologist/Psychiatrist/CAMHS team?**

- Are they a Paediatric Psych

**18. Do you have a Pharmacist?**

- Are they Renal Pharmacist(s)

**19. Do you have any Playworkers?**

- Are they Renal Playworkers(s)

**20. Do you have a hospital based teacher/ teaching assistant  
*Involved in Renal condition teaching/ reinforcing?***

**21. Do you have a Renal Nurse Educator?**

**22. Do you have a youth worker?**

- Are they a Renal youth worker

**23. Do you have a social worker?**

- Are they a Renal social worker

**24. Do you have any other staff members who are involved in patient/family teaching/ reinforcing?**

**25. How many families does your MDT support? (if feasible to answer/ approx)**

**26. Number of children on haemodialysis?**

**27. Number of children on peritoneal dialysis?**

**28. Number of children with transplants?**

**29. Number of children on tube feeds?**

**30. Number of children on Erythropoietin injections (EPO)?**
